# Supplementary material for: How experience modulates semantic memory for food: evidence from elderly adults and centenarians
Source: Sci Rep. 2018 Apr 24;8:6468. doi: 10.1038/s41598-018-24776-3 (PMC5915576; doi:10.1038/s41598-018-24776-3)
Supplement: Supplementary file 3 — Dataset1 [file 41598_2018_24776_MOESM3_ESM.xlsx]

## Sheet: Sheet1
freq_NfvsTf	naming_NfvsTf
0.8	0.222222
-0.8	-0.055556
0	0.111111
1	0.111111
0.2	-0.111111
0.6	-0.055556
1.2	0.055556
1.4	0.055556
0.6	0.055556
1.4	0.166667
0	0.111111
0.2	0.111111
0.2	0
0.6	-0.055556
0.4	0
0.4	0.166667
-0.5	0.111111
-0.8	0.111111
0	-0.277778
0	-0.055556
0	-0.111111
0	-0.055556
0	-0.055556
0	-0.222222
0	-0.111111
0	-0.111111
0	-0.111111
0	0.055556
0	-0.166667
0	-0.333333
0	-0.111111
0	-0.222222
1	0.166667
0	0.055556
0	0
0	0
0	0.111111
