# Supplementary material for: How experience modulates semantic memory for food: evidence from elderly adults and centenarians
Source: Sci Rep. 2018 Apr 24;8:6468. doi: 10.1038/s41598-018-24776-3 (PMC5915576; doi:10.1038/s41598-018-24776-3)
Supplement: Supplementary file 4 — Dataset2 [file 41598_2018_24776_MOESM4_ESM.xlsx]

## Sheet: Sheet1
	gr	food	nonfood_nonfood	food_nonfood	tot	all	F-n/F-n	nF-i/F-n	nF-i/nF-i	all	F-I/F-I	F-i/nF-i	nF-i/nF-i	all	F-n/F-n	F-n/nF-n	nF-n/nF-n	all	F-i/F-i	F-i/nF-n	nF-n/nF-n	NF	TF
1	1	100	100	100	100	100	100	100	100	100	100	100	100	100	100	100	100	100	100	100	100	100	100
2	1	91.6667	100	94.4444	95.1389	94.4444	88.8889	94.4444	100	94.4444	88.8889	94.4444	100	97.2222	100	94.4444	100	94.4444	88.8889	94.4444	100	94.4444	88.8889
3	1	100	97.2222	100	99.3056	100	100	100	100	100	100	100	100	97.2222	100	100	88.8889	100	100	100	100	100	100
4	1	91.6667	91.6667	87.5	89.5833	91.6667	77.7778	94.4444	100	94.4444	100	88.8889	100	86.1111	88.8889	83.3333	88.8889	86.1111	100	83.3333	77.7778	83.3333	100
5	1	100	97.2222	93.0556	95.8333	94.4444	100	88.8889	100	97.2222	100	94.4444	100	100	100	100	100	91.6667	100	88.8889	88.8889	100	100
6	1	100	100	95.8333	97.9167	97.2222	100	94.4444	100	97.2222	100	94.4444	100	97.2222	100	94.4444	100	100	100	100	100	100	100
7	1	100	100	100	100	100	100	100	100	100	100	100	100	100	100	100	100	100	100	100	100	100	100
8	1	100	91.6667	95.8333	95.8333	97.2222	100	94.4444	100	97.2222	100	100	88.8889	97.2222	100	94.4444	100	91.6667	100	94.4444	77.7778	100	100
9	1	100	91.6667	98.6111	97.2222	91.6667	100	94.4444	77.7778	97.2222	100	100	88.8889	100	100	100	100	100	100	100	100	100	100
10	1	100	91.6667	86.1111	90.9722	94.4444	100	94.4444	88.8889	94.4444	100	88.8889	100	80.5556	100	72.2222	77.7778	94.4444	100	88.8889	100	100	100
11	1	94.4444	94.4444	93.0556	93.75	97.2222	100	100	88.8889	97.2222	100	94.4444	100	91.6667	100	88.8889	88.8889	88.8889	77.7778	88.8889	100	100	88.8889
12	1	91.6667	100	98.6111	97.2222	100	100	100	100	94.4444	88.8889	94.4444	100	97.2222	88.8889	100	100	97.2222	88.8889	100	100	94.4444	88.8889
13	1	97.2222	100	97.2222	97.9167	97.2222	100	94.4444	100	100	100	100	100	94.4444	88.8889	94.4444	100	100	100	100	100	94.4444	100
14	1	94.4444	91.6667	95.8333	94.4444	91.6667	77.7778	94.4444	100	100	100	100	100	91.6667	100	88.8889	88.8889	94.4444	100	100	77.7778	88.8889	100
15	1	100	100	98.6111	99.3056	100	100	100	100	100	100	100	100	97.2222	100	94.4444	100	100	100	100	100	100	100
16	1	97.2222	77.7778	95.8333	91.6667	97.2222	88.8889	100	100	100	100	100	100	88.8889	100	100	55.5556	80.5556	100	83.3333	55.5556	94.4444	100
17	1	91.6667	94.4444	95.8333	94.4444	100	100	100	100	94.4444	88.8889	94.4444	100	88.8889	77.7778	94.4444	88.8889	94.4444	100	94.4444	88.8889	88.8889	94.4444
18	1	97.2222	94.4444	94.4444	95.1389	100	100	100	100	94.4444	88.8889	94.4444	100	94.4444	100	94.4444	88.8889	91.6667	100	88.8889	88.8889	100	94.4444
101	3	100	100	98.6111	99.3056	100	100	100	100	100	100	100	100	97.2222	100	94.4444	100	100	100	100	100	100	100
102	3	100	100	100	100	100	100	100	100	100	100	100	100	100	100	100	100	100	100	100	100	100	100
103	3	100	100	98.6111	99.3056	100	100	100	100	100	100	100	100	97.2222	100	94.4444	100	100	100	100	100	100	100
104	3	100	100	100	100	100	100	100	100	100	100	100	100	100	100	100	100	100	100	100	100	100	100
105	3	100	94.4444	100	98.6111	97.2222	100	100	88.8889	100	100	100	100	97.2222	100	100	88.8889	100	100	100	100	100	100
106	3	100	86.1111	95.8333	94.4444	100	100	100	100	100	100	100	100	86.1111	100	88.8889	66.6667	91.6667	100	94.4444	77.7778	100	100
107	2	100	100	100	100	100	100	100	100	100	100	100	100	100	100	100	100	100	100	100	100	100	100
108	3	100	86.1111	90.2778	91.6667	100	100	100	100	100	100	100	100	80.5556	100	77.7778	66.6667	86.1111	100	83.3333	77.7778	100	100
109	3	100	88.8889	94.4444	94.4444	100	100	100	100	100	100	100	100	88.8889	100	88.8889	77.7778	88.8889	100	88.8889	77.7778	100	100
110	3	100	88.8889	94.4444	94.4444	100	100	100	100	100	100	100	100	88.8889	100	88.8889	77.7778	88.8889	100	88.8889	77.7778	100	100
111	3	100	86.1111	97.2222	95.1389	100	100	100	100	100	100	100	100	86.1111	100	94.4444	55.5556	94.4444	100	94.4444	88.8889	100	100
112	3	100	80.5556	97.2222	93.75	97.2222	100	100	88.8889	100	100	100	100	86.1111	100	94.4444	55.5556	91.6667	100	94.4444	77.7778	100	100
113	3	100	88.8889	94.4444	94.4444	100	100	100	100	100	100	100	100	88.8889	100	88.8889	77.7778	88.8889	100	88.8889	77.7778	100	100
114	3	100	88.8889	100	97.2222	100	100	100	100	100	100	100	100	88.8889	100	100	55.5556	100	100	100	100	100	100
115	3	100	100	100	100	100	100	100	100	100	100	100	100	100	100	100	100	100	100	100	100	100	100
116	3	100	66.6667	93.0556	88.1944	88.8889	100	100	55.5556	94.4444	100	100	77.7778	83.3333	100	83.3333	66.6667	86.1111	100	88.8889	66.6667	100	100
117	2	100	100	100	100	100	100	100	100	100	100	100	100	100	100	100	100	100	100	100	100	100	100
118	3	100	88.8889	100	97.2222	100	100	100	100	97.2222	100	100	88.8889	94.4444	100	100	77.7778	97.2222	100	100	88.8889	100	100
119	3	100	94.4444	98.6111	97.9167	100	100	100	100	97.2222	100	100	88.8889	94.4444	100	94.4444	88.8889	100	100	100	100	100	100
120	3	100	91.6667	100	97.9167	97.2222	100	100	88.8889	100	100	100	100	97.2222	100	100	88.8889	97.2222	100	100	88.8889	100	100
121	3	100	83.3333	98.6111	95.1389	100	100	100	100	100	100	100	100	80.5556	100	94.4444	33.3333	100	100	100	100	100	100
122	3	94.4444	61.1111	97.2222	87.5	91.6667	100	100	66.6667	100	100	100	100	80.5556	100	94.4444	33.3333	77.7778	77.7778	94.4444	44.4444	100	88.8889
123	3	100	100	100	100	100	100	100	100	100	100	100	100	100	100	100	100	100	100	100	100	100	100
124	2	100	100	95.8333	97.9167	100	100	100	100	97.2222	100	94.4444	100	97.2222	100	94.4444	100	97.2222	100	94.4444	100	100	100
125	3	100	97.2222	98.6111	98.6111	100	100	100	100	100	100	100	100	94.4444	100	94.4444	88.8889	100	100	100	100	100	100
126	2	100	91.6667	100	97.9167	100	100	100	100	100	100	100	100	91.6667	100	100	66.6667	100	100	100	100	100	100
127	3	100	97.2222	100	99.3056	97.2222	100	100	88.8889	100	100	100	100	100	100	100	100	100	100	100	100	100	100
128	2	100	83.3333	98.6111	95.1389	94.4444	100	100	77.7778	100	100	100	100	88.8889	100	94.4444	66.6667	97.2222	100	100	88.8889	100	100
129	2	100	100	100	100	100	100	100	100	100	100	100	100	100	100	100	100	100	100	100	100	100	100
130	2	100	100	100	100	100	100	100	100	100	100	100	100	100	100	100	100	100	100	100	100	100	100
131	2	94.4444	91.6667	97.2222	95.1389	100	100	100	100	100	100	100	100	88.8889	100	88.8889	77.7778	91.6667	77.7778	100	88.8889	100	88.8889
132	2	100	100	100	100	100	100	100	100	100	100	100	100	100	100	100	100	100	100	100	100	100	100
133	2	100	100	100	100	100	100	100	100	100	100	100	100	100	100	100	100	100	100	100	100	100	100
134	2	100	94.4444	97.2222	97.2222	100	100	100	100	100	100	100	100	94.4444	100	94.4444	88.8889	94.4444	100	94.4444	88.8889	100	100
135	2	100	100	100	100	100	100	100	100	100	100	100	100	100	100	100	100	100	100	100	100	100	100
136	3	100	100	100	100	100	100	100	100	100	100	100	100	100	100	100	100	100	100	100	100	100	100
137	2	100	100	100	100	100	100	100	100	100	100	100	100	100	100	100	100	100	100	100	100	100	100
138	2	100	94.4444	97.2222	97.2222	100	100	100	100	100	100	100	100	94.4444	100	94.4444	88.8889	94.4444	100	94.4444	88.8889	100	100
139	2	100	100	100	100	100	100	100	100	100	100	100	100	100	100	100	100	100	100	100	100	100	100
140	2	100	100	100	100	100	100	100	100	100	100	100	100	100	100	100	100	100	100	100	100	100	100
141	2	97.2222	94.4444	100	97.9167	100	100	100	100	97.2222	88.8889	100	100	97.2222	100	100	88.8889	97.2222	100	100	88.8889	100	94.4444
142	2	100	97.2222	97.2222	97.9167	100	100	100	100	100	100	100	100	91.6667	100	88.8889	88.8889	100	100	100	100	100	100
143	2	100	100	98.6111	99.3056	100	100	100	100	100	100	100	100	97.2222	100	94.4444	100	100	100	100	100	100	100
