# Supplementary material for: How experience modulates semantic memory for food: evidence from elderly adults and centenarians
Source: Sci Rep. 2018 Apr 24;8:6468. doi: 10.1038/s41598-018-24776-3 (PMC5915576; doi:10.1038/s41598-018-24776-3)
Supplement: Supplementary file 5 — Datset3 [file 41598_2018_24776_MOESM5_ESM.xlsx]

## Sheet: 174258_0_data_set_4858431_btdwb
group	diet_tf	diet_nf	wtop_tf	wtop_nf	naming_tf	naming_nf
1	1.2	2	17	17	9	13
1	1.8	1	12	17	7	6
1	2	2	16	17	13	15
1	1	2	12	13	4	6
1	1.8	2	18	18	11	9
1	1.4	2	17	16	4	3
1	0.8	2	18	18	14	15
1	0.6	2	18	17	6	7
1	1.4	2	14	16	10	11
1	0.6	2	15	17	6	9
1	2	2	13	18	8	10
1	1.8	2	17	16	7	9
1	1.8	2	16	17	8	8
1	1.4	2	16	17	7	8
1	1.6	2	16	17	12	12
1	1.6	2	15	16	9	12
1	2	1.5	13	16	8	10
1	1.8	1	16	18	12	14
2	2	2	18	18	18	13
2	2	2	18	18	18	17
2	2	2	18	18	17	15
2	2	2	18	18	16	15
2	2	2	18	18	16	15
2	2	2	18	18	17	13
2	2	2	18	18	18	16
2	2	2	18	18	18	16
2	2	2	18	18	17	15
2	2	2	18	18	15	16
2	2	2	18	18	15	12
2	2	2	18	18	18	12
2	2	2	18	18	17	15
2	2	2	18	18	16	12
2	1	2	18	18	12	15
2	2	2	16	18	11	12
2	2	2	18	18	17	17
2	2	2	18	18	16	16
2	2	2	18	18	14	16
