# Supplementary material for: How experience modulates semantic memory for food: evidence from elderly adults and centenarians
Source: Sci Rep. 2018 Apr 24;8:6468. doi: 10.1038/s41598-018-24776-3 (PMC5915576; doi:10.1038/s41598-018-24776-3)
Supplement: Supplementary file 6 — Dataset5 [file 41598_2018_24776_MOESM6_ESM.xlsx]

## Sheet: Sheet1
ID	AGE	AGE_GROUP	EDUCATION	MMSE	GENDER	NAMING_FOOD	NAMING_NONFOOD	NAMING_TF	NAMING_NF	NAMING_NLT	NAMING_LT	NAMING_TOT	WTOP_FOOD	WTOP_NONFOOD	WTOP_TF	WTOP_NF	WTOP_NLT	WTOP_LT	WTOP_TOT
1	100.758	1	9	26	0	22	23	9	13	15	8	46	34	32	17	17	17	15	66
2	104.663	1	8	24	1	13	24	7	6	13	11	37	29	29	12	17	15	14	58
3	101.695	1	8	12	0	28	29	13	15	17	12	58	33	32	16	17	17	15	65
4	108	1	8	22	0	10	12	4	6	8	4	22	25	26	12	13	13	13	51
5	101	1	13	21	1	20	15	11	9	6	9	35	36	31	18	18	15	16	67
6	108.17	1	13	27	0	7	5	4	3	3	2	13	33	27	17	16	12	15	60
7	101.539	1	5	23.75	0	29	31	14	15	16	15	61	36	36	18	18	18	18	72
8	102	1	8	26	0	13	11	6	7	7	4	24	35	33	18	17	17	16	68
9	101.593	1	8	17	1	21	25	10	11	15	10	47	30	32	14	16	16	16	62
10	101.763	1	4	17	0	15	11	6	9	6	5	27	32	33	15	17	17	16	65
11	100	1	11	24	0	18	20	8	10	12	8	38	31	33	13	18	17	16	64
12	101	1	10	28	1	16	24	7	9	15	9	40	33	34	17	16	18	16	67
13	102.9	1	5	23	1	16	22	8	8	14	8	38	33	36	16	17	18	18	69
14	101	1	2	24	1	17	22	7	8	13	9	40	33	34	16	17	17	17	67
15	101	1	5	23	0	24	28	12	12	17	11	52	33	34	16	17	18	16	67
16	102.9	1	3	24	0	21	14	9	12	8	6	35	31	33	15	16	18	15	64
17	102.3	1	5	26	0	18	23	8	10	13	10	42	29	33	13	16	16	17	62
18	100.5	1	5	30	0	26	28	12	14	13	15	55	34	35	16	18	18	17	69
101	71	2	13	26.7	1	33	35	17	16	18	17	69	36	36	18	18	18	18	72
102	70	2	13	24.7	1	32	31	17	15	15	16	64	36	36	18	18	18	18	72
103	73	2	13	27.7	1	30	32	16	14	16	16	63	36	36	18	18	18	18	72
104	62	2	13	27.2	0	34	34	18	16	17	17	69	36	36	18	18	18	18	72
105	73	2	8	28.4	0	32	34	17	15	17	17	67	36	36	18	18	18	18	72
106	74	2	8	26.3	1	31	34	16	15	18	16	66	36	36	18	18	18	18	72
107	75	3	8	28.7	0	32	36	16	16	18	18	69	36	35	18	18	17	18	71
108	56	2	8	27	1	33	31	17	16	15	16	64	36	36	18	18	18	18	72
109	63	2	8	26	0	32	34	16	16	16	18	67	36	36	18	18	18	18	72
110	63	2	8	24	0	31	32	16	15	16	16	64	36	36	18	18	18	18	72
111	73	2	8	27.4	0	32	34	18	14	18	16	67	36	35	18	18	18	17	71
112	73	2	8	27.4	1	31	34	15	16	17	17	66	36	36	18	18	18	18	72
113	65	2	5	25.9	0	34	28	17	17	18	10	63	36	36	18	18	18	18	72
114	62	2	8	27	1	33	36	18	15	18	18	70	36	36	18	18	18	18	72
115	51	2	8	27	0	35	35	18	17	17	18	71	36	36	18	18	18	18	72
116	67	2	5	24.9	1	34	27	18	16	15	12	62	36	36	18	18	18	18	72
117	75	3	8	28	0	34	31	18	16	15	16	66	36	36	18	18	18	18	72
118	69	2	8	28.4	0	34	35	18	16	18	17	70	36	36	18	18	18	18	72
119	70	2	8	27	1	31	35	17	14	18	17	67	36	36	18	18	18	18	72
120	55	2	8	30	0	34	35	17	17	18	17	70	36	36	18	18	18	18	72
121	72	2	13	25.4	0	32	35	17	15	18	17	68	36	36	18	18	18	18	72
122	74	2	8	30	0	30	33	14	16	16	17	64	36	36	18	18	18	18	72
123	74	2	8	25.3	0	30	33	16	14	15	18	64	36	36	18	18	18	18	72
124	84	3	13	23.1	0	27	30	14	13	14	16	58	35	35	18	17	18	17	70
125	74	2	8	30	0	32	34	16	16	18	16	67	36	36	18	18	18	18	72
126	76	3	8	30	0	31	32	18	13	18	14	64	36	36	18	18	18	18	72
127	70	2	8	30	0	35	34	18	17	17	17	70	36	36	18	18	18	18	72
128	75	3	13	26.3	1	32	32	17	15	16	16	65	36	36	18	18	18	18	72
129	75	3	5	24.3	0	31	33	16	15	18	15	65	36	36	18	18	18	18	72
130	76	3	5	27.3	1	31	34	16	15	17	17	66	36	36	18	18	18	18	72
131	79	3	5	27.7	1	30	33	17	13	17	16	64	36	35	18	18	17	18	71
132	75	3	5	28.7	0	34	33	18	16	17	16	68	36	36	18	18	18	18	72
133	78	3	8	30	0	35	34	18	16	16	18	69	36	36	18	18	18	18	72
134	81	3	13	30	0	33	33	17	15	16	17	66	36	36	18	18	18	18	72
135	77	3	8	30	0	31	34	15	16	16	18	66	36	36	18	18	18	18	72
136	72	2	8	30	0	28	35	15	12	18	17	63	36	36	18	18	18	18	72
137	83	3	8	30	0	31	33	18	12	17	16	63	36	36	18	18	18	18	72
138	85	3	3	30	0	33	31	17	15	17	14	64	36	36	18	18	18	18	72
139	83	3	13	30	0	29	33	16	12	15	18	62	36	36	18	18	18	18	72
140	80	3	18	28	1	28	32	12	15	16	16	59	36	36	18	18	18	18	72
141	91	3	5	24	1	24	26	11	12	15	11	49	34	35	16	18	18	17	69
142	79	3	18	26	1	35	31	17	17	15	16	66	36	36	18	18	18	18	72
143	77	3	18	30	0	32	34	16	16	17	17	67	36	36	18	18	18	18	72
